# Supplementary material
Source: ML conference proceedings conference paper supplement (https://openaccess.thecvf.com/content/CVPR_2019/html/Shuster_Engaging_Image_Captioning_CVPR_2019_paper.html)
Supplement: Supplementary file 1 [file Shuster_Engaging_Image_Captioning_CVPR_2019_supplemental.pdf]

## A. Impact of Pretrained Word Embeddings and Text Encoders

TransResNet encodes captions using a transformer architecture, which can be pre-trained:

- either by pre-training the word embeddings on a large corpus of text. In this case we used the pre-trained word vector released by FastText [5]
- or by pre-training the entire encoder on a similar task, in which case we followed the setting of [36].

Table 9, Table 10 and Table 12 show several ablation studies showing the importance of this pre-training.

The same word-pretraining can be attempted on generative models as well. Table 11 shows that 0.8 BLEU can be gained.

## B. Engaging Captions, with no personality conditioning

**Engaging-only Captions** Instead of asking to author a caption based on a personality trait, we can ask humans to simply write an “engaging” caption instead, providing them with no personality cue. We found that human annotators overall preferred unconditioned captions to those conditioned on a personality by a slight margin ( $\sim 54\%$ ). To further understand this difference, we split the images into three subsets based on the personality on which the PERSONALITY-CAPTIONS annotator conditioned their caption, i.e. whether the personality was positive, negative, or neutral. We then examined the engagingness rates of images for each of these subsets. In the set where PERSONALITY-CAPTIONS annotators were provided with positive personalities, which totaled 185 out of the 500 images, we found that human annotators preferred the captions conditioned on the personality to those that were not. However, in the other two sets, we found that the unconditioned captions were preferred to the negative or neutral ones. For these two subsets, we believe that, without the context of any personality, annotators may have preferred the inherently more positive caption provided by someone who was asked to be engaging but was not conditioned on a personality.

**Diversity of captions** We found that the captions written via our method were not only more engaging for positive personality traits, but also resulted in more diversity in terms of personality traits. To measure this diversity, we constructed a model that predicted the personality of a given comment. The classifier consists in the same Transformer as described in 4.3, pre-trained on the same large dialog corpus, followed by a softmax over 215 units. We then compare the total number of personality types as predicted by

the classifier among each type of human-labeled data: “engaging” captions conditioned on personalities, “engaging” captions not conditioned on personalities, and traditional image captions. That is, we look at each caption given by the human annotators, assign it a personality via the classifier, and then look at the total set of personalities we have at the end for each set of human-labeled data. For example, out of the 500 human-generated traditional captions, the classifier found 63% of all possible positive personalities in this set of captions. As indicated in Table 14, the human annotators who were assigned a personality produce more diverse captions, particularly negatively and neutrally conditioned ones, as compared to human annotators who are just told to be “engaging” or those who are told to write an image caption.

## C. Comparing Generative and Retrieval Models on COCO

The ultimate test of our generative and retrieval models on PERSONALITY-CAPTIONS is performed using human evaluations. Comparing them using automatic metrics is typically difficult because retrieval methods perform well with ranking metrics they are optimized for and generative models perform well with word overlap metrics they are optimized for, but neither of these necessarily correlate with human judgements, see e.g. [58].

Nevertheless, here we compare our generative and retrieval models directly with automatic metrics on COCO. We computed the BLEU, CIDEr, SPICE, and ROUGE-L scores for our best TransResNet model. The comparison is given in Table 15.

| Model                                       | Text Encoder<br>Pretraining | Caption retrieval |             |             |          |
|---------------------------------------------|-----------------------------|-------------------|-------------|-------------|----------|
|                                             |                             | R@1               | R@5         | R@10        | Med Rank |
|                                             |                             | 1k Images         |             |             |          |
| m-CNN [31]                                  |                             | 42.8              | -           | 84.1        | 2.0      |
| UVS [25]                                    |                             | 43.4              | 75.7        | 85.8        | 2.0      |
| HM-LSTM [39]                                |                             | 43.9              | -           | 87.8        | 2.0      |
| Order Embeddings [49]                       |                             | 46.7              | -           | 88.9        | 2.0      |
| Embedding Net [51]                          |                             | 50.4              | 79.3        | 69.4        | -        |
| DSPE+Fisher Vector [52]                     |                             | 50.1              | -           | 89.2        | -        |
| sm-LSTM [19]                                |                             | 53.2              | 83.1        | 91.5        | 1.0      |
| VSE++ (ResNet, FT) [13]                     |                             | 64.6              | 90.0        | 95.7        | 1.0      |
| GXN (i2t+t2i) [15]                          |                             | 68.5              | -           | <b>97.9</b> | 1.0      |
| [12]                                        |                             | <b>69.8</b>       | <b>91.9</b> | 96.6        | 1.0      |
| Transformer <sup>†</sup> , Resnet152        | Word                        | 21.7              | 45.6        | 58.9        | 7.0      |
| Bag of words, ResNeXt-IG-3.5B               | None                        | 51.6              | 85.3        | 93.4        | 1.4      |
| Bag of words <sup>†</sup> , ResNeXt-IG-3.5B | Word                        | 54.7              | 87.1        | 94.5        | 1.0      |
| Transformer, ResNeXt-IG-3.5B                | None                        | 63.4              | 90.6        | 96.3        | 1.0      |
| Transformer <sup>†</sup> , ResNeXt-IG-3.5B  | Word                        | 66.6              | 90.6        | 96.3        | 1.0      |
| Transformer*, ResNeXt-IG-3.5B               | Full                        | 67.3              | 91.7        | 96.5        | 1.0      |
|                                             |                             | 1k Images         |             |             |          |
| Order Embeddings [49]                       |                             | 23.3              | -           | 65.0        | 5.0      |
| VSE++ (ResNet, FT) [13]                     |                             | 41.3              | 71.1        | 81.2        | 2.0      |
| GXN (i2t+t2i) [15]                          |                             | 42.0              | -           | 84.7        | 2.0      |
| Transformer, Resnet152                      | Word                        | 7.8               | 21.9        | 31.2        | 30.0     |
| Bag of words, ResNeXt-IG-3.5B               | None                        | 26.6              | 58.6        | 73.0        | 4.0      |
| Bag of words, ResNeXt-IG-3.5B               | Word                        | 29.7              | 62.9        | 75.7        | 3.0      |
| Transformer, ResNeXt-IG-3.5B                | None                        | 38.8              | 71.6        | 82.7        | 2.0      |
| Transformer, ResNeXt-IG-3.5B                | Word                        | 44                | 73.7        | <b>84</b>   | 2.0      |
| Transformer, ResNeXt-IG-3.5B                | Full                        | <b>44.3</b>       | <b>74.5</b> | 83.9        | 2.0      |

Table 9: More detailed results for retrieval model performance on COCO Captions using the splits of [24]. For our TransResNet models, we compare two types of pretraining: Full indicates a model with a pretrained text encoder, while Word indicates a model with pretrained word embeddings only.

| Model                         | Text Encoder<br>Pretraining | Caption retrieval |             |             |          |
|-------------------------------|-----------------------------|-------------------|-------------|-------------|----------|
|                               |                             | R@1               | R@5         | R@10        | Med Rank |
| UVS [25]                      |                             | 23.0              | 50.7        | 62.9        | 5.0      |
| UVS (Github)                  |                             | 29.8              | 58.4        | 70.5        | 4.0      |
| Embedding Net [51]            |                             | 40.7              | 69.7        | 79.2        | -        |
| DAN [38]                      |                             | 41.4              | 73.5        | 82.5        | 2.0      |
| sm-LSTM [19]                  |                             | 42.5              | 71.9        | 81.5        | 2.0      |
| 2WayNet [11]                  |                             | 49.8              | 67.5        | -           | -        |
| VSE++ (ResNet, FT) [13]       |                             | 52.9              | 80.5        | 87.2        | 1.0      |
| DAN (ResNet) [38]             |                             | 55.0              | 81.8        | 89.0        | 1.0      |
| GXN (i2t+t2i) [15]            |                             | 56.8              | -           | 89.6        | 1.0      |
| Transformer, Resnet152        | Word                        | 10.3              | 27.3        | 38.8        | 19       |
| Bag of words, ResNeXt-IG-3.5B | None                        | 50.0              | 81.1        | 90.0        | 1.5      |
| Transformer, ResNeXt-IG-3.5B  | None                        | 55.6              | 83.2        | 90.5        | 1.0      |
| Bag of words, ResNeXt-IG-3.5B | Word                        | 58.6              | 87.2        | 92.9        | 1.0      |
| Transformer, ResNeXt-IG-3.5B  | Full                        | 62.3              | 88.5        | 94.4        | 1.0      |
| Transformer, ResNeXt-IG-3.5B  | Word                        | <b>68.4</b>       | <b>90.6</b> | <b>95.3</b> | 1.0      |

Table 10: Retrieval model performance on Flickr30k using the splits of [24]. For our models, we compare two types of pretraining: Full indicates a model with a pretrained text encoder, while Word indicates a model with pretrained word embeddings only.

| Method                                  | Image Encoder   | Personality | BLEU1       | BLEU4      | ROUGE-L     | CIDEr       | SPICE      |
|-----------------------------------------|-----------------|-------------|-------------|------------|-------------|-------------|------------|
| <i>no pretraining:</i>                  |                 |             |             |            |             |             |            |
| SHOWTELL                                | ResNeXt-IG-3.5B | Yes         | 38.4        | 7.3        | 24.3        | 9.6         | 1.6        |
| SHOWATTTELL                             | ResNeXt-IG-3.5B | Yes         | 43.3        | 7.1        | 27.0        | 12.6        | 3.6        |
| UPDOWN                                  | ResNeXt-IG-3.5B | Yes         | 44.0        | 8.0        | 27.4        | <b>16.5</b> | <b>5.2</b> |
| <i>with word embedding pretraining:</i> |                 |             |             |            |             |             |            |
| SHOWTELL <sup>†</sup>                   | ResNeXt-IG-3.5B | Yes         | 40.1        | 7.7        | 25.3        | 11.0        | 2.2        |
| SHOWATTTELL <sup>†</sup>                | ResNeXt-IG-3.5B | Yes         | 44.6        | 7.5        | 25.9        | 12.6        | 3.6        |
| UPDOWN <sup>†</sup>                     | ResNeXt-IG-3.5B | Yes         | <b>44.8</b> | <b>8.1</b> | <b>27.7</b> | 16.3        | <b>5.2</b> |

Table 11: Comparing Generative model caption performance on the PERSONALITY-CAPTIONS test set: pretrained word embeddings vs. no pretraining. Pretraining makes a very small impact in this case, unlike in our retrieval models.

| Text Encoder |             | Image Encoder   | Personality Encoder | R@1         |
|--------------|-------------|-----------------|---------------------|-------------|
| Encoder Type | Pretraining |                 |                     |             |
| Transformer  | Full        | ResNeXt-IG-3.5B | Yes                 | <b>77.5</b> |
| Transformer  | Word        | ResNeXt-IG-3.5B | Yes                 | 71.7        |
| Bag of Words | Word        | ResNeXt-IG-3.5B | Yes                 | 66.2        |
| Transformer  | None        | ResNeXt-IG-3.5B | Yes                 | 65.9        |
| Bag of Words | None        | ResNeXt-IG-3.5B | Yes                 | 58.6        |
| Transformer  | Full        | ResNeXt-IG-3.5B | No                  | 53.9        |
| Transformer  | Full        | Resnet152       | Yes                 | 51.7        |
| Transformer  | Word        | Resnet152       | Yes                 | 45.4        |
| Transformer  | None        | Resnet152       | Yes                 | 40.6        |
| Bag of Words | Word        | Resnet152       | Yes                 | 40.5        |
| Bag of Words | None        | Resnet152       | Yes                 | 35.4        |
| Transformer  | Full        | Resnet152       | No                  | 18.7        |

Table 12: Retrieval model performance on PERSONALITY-CAPTIONS. We compare two types of pretraining: Full indicates a model with a pretrained text encoder, while Word indicates a model with pretrained word embeddings only.

| Type of caption A                     | WIN PERCENTAGE |             | Type of caption B       |
|---------------------------------------|----------------|-------------|-------------------------|
| Human (all) personality captions      | 45.5           | <b>54.5</b> | Human engaging captions |
| Human (positive) personality captions | <b>51.2</b>    | 48.8        | Human engaging captions |

Table 13: Pairwise win rates of various approaches, evaluated in terms of engagingness

| Annotation Task           | Personality Trait Coverage |         |          |
|---------------------------|----------------------------|---------|----------|
|                           | Positive                   | Neutral | Negative |
| Given Personalities       | 100%                       | 100%    | 99.0%    |
| Traditional Caption       | 63.0%                      | 83.3%   | 47.0%    |
| Engaging, No Conditioning | 81.5%                      | 91.7%   | 71.4%    |
| PERSONALITY-CAPTIONS      | 82.7%                      | 94.4%   | 87.8%    |

Table 14: Caption diversity in human annotation tasks. PERSONALITY-CAPTIONS provides more diverse personality traits than traditional captions or collecting engaging captions without specifying a personality trait to the annotator, as measured by a personality trait classifier.

| Model       | BLEU1 | BLEU4       | ROUGE-L     | CIDEr        | SPICE |
|-------------|-------|-------------|-------------|--------------|-------|
| TransResNet | 50.6  | 10.9        | 38.0        | 49.1         | 13.9  |
| SHOWTELL    | 78.2  | 35.0        | 56.6        | 119.9        | 20.8  |
| SHOWATTTELL | 78.8  | 35.6        | 57.1        | 121.8        | 20.6  |
| UPDOWN      | 79.3  | <b>36.4</b> | <b>57.5</b> | <b>124.0</b> | 21.2  |

Table 15: Generative and retrieval model performance on COCO caption using the test split of [24]. All models use ResNeXt-IG-3.5B image features.

## Comment on an Image

### Description

In this task, you will be shown 5 images, and will write a comment about each image. The goal of this task is to write something about an image that someone else would find engaging.

**STEP 1**

With each new photo, you will be given a **personality trait** that you will try to emulate in your comment. For example, you might be given "**snarky**" or "**glamorous**". The personality describes **YOU**, not the picture. It is **you** who is snarky or glamorous, not the contents of the image.

**STEP 2**

You will then be shown an image, for which you will write a comment *in the context of your given personality trait*. Please make sure your comment has at least **three words**. Note that these are *comments*, not captions.

E.g., you may be shown an image of a tree. If you are "**snarky**", you might write "What a boring tree, I bet it has bad wood;" or, if you were "**glamorous**", you might write "What an absolutely beautiful tree! I would put this in my living room it's so extravagant!"

## Image



**Your assigned personality is:**

**Adventurous**

Reminder - please do not write anything that involves any level of discrimination, racism, sexism and offensive religious/politics comments, otherwise the submission will be rejected.

Figure 3: Instructions for the annotation task collecting the data for PERSONALITY-CAPTIONS.



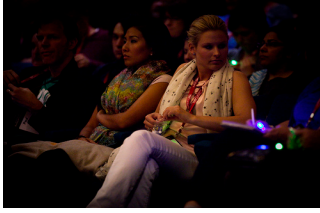

*Sarcastic*

Yes please sit by me

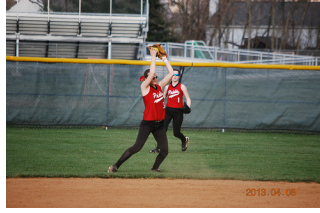

*Mellow*

Look at that smooth easy catch of the ball. like ballet.

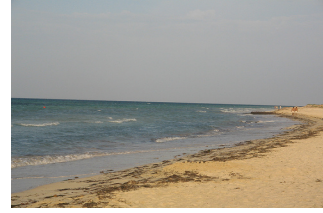

*Zany*

I wish I could just run down this shore!

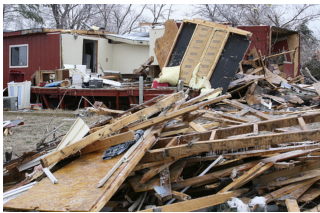

*Contradictory*

Love what you did with the place!

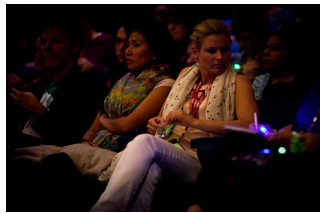

*Mellow*

Look at that smooth easy catch of the ball. like ballet.

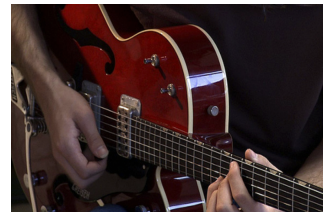

*Energetic*

About to play the best tune you've ever heard in your life. Get ready!

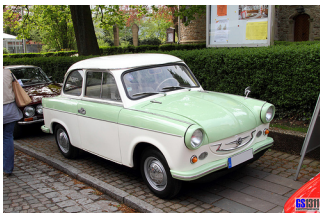

*Kind*

they left me a parking spot

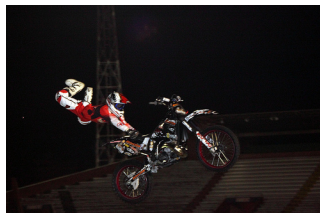

*Spirited*

That is one motor cycle enthusiast!!!

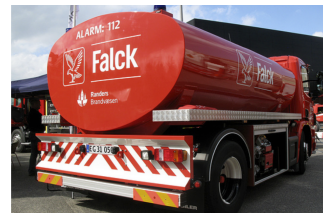

*Creative*

Falck alarm, everyone. Just a Falck alarm.

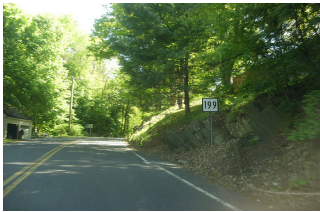

*Crazy*

I drove down this road backwards at 90 miles per hour three times

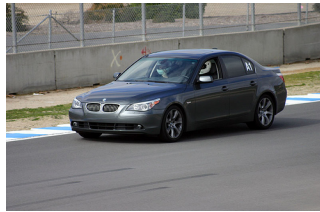

*Morbid*

I hope this car doesn't get into a wreck.

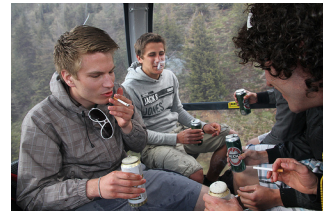

*Questioning*

Why do people think its cool to smoke cigarettes?

Table 16: Some samples from PERSONALITY-CAPTIONS. For each sample we asked a person to write a caption that fits both the image and the personality.

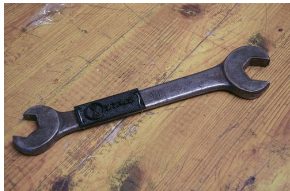

*Old-fashioned*  
origin: TransResNet  
fit: does not fit image  
Each of these hammers has a mission.

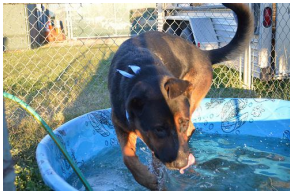

*Destructive*  
origin: TransResNet  
fit: does not fit personality  
that dog is going to drown!  
someone save it.

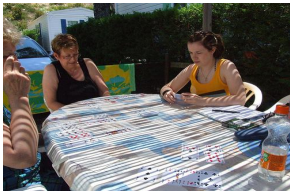

*Courageous*  
origin: TransResNet  
fit:neither  
Look at all of those sewing materials! You could create all sorts of art projects with them!

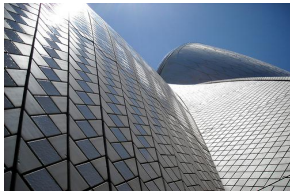

*Meticulous*  
origin: human  
fit: neither  
The desert is so overwhelming and vast I totally want to go exploring again!

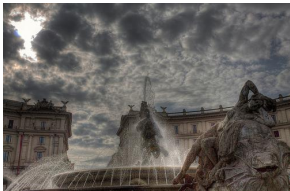

*Sympathetic*  
origin: human  
fit: does not fit personality  
relaxing,calm and authentic

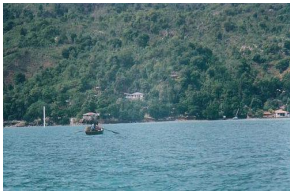

*Bewildered*  
origin: human  
fit:neither  
Graduating school and you finally feel like you're invincible.

Table 17: Some examples of captions that do not fit either the personality or the image, produced by humans and TransResNet

| Image and Pers.                                                                                      | Use pers. | Captioning  | Caption                                                                        |
|------------------------------------------------------------------------------------------------------|-----------|-------------|--------------------------------------------------------------------------------|
| 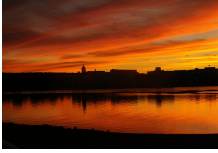<br>Spirited        | No        | Standard    | A city on the background, a lake on the front, during a sunset.                |
|                                                                                                      | No        | Engaging    | Talk about summer fun! Can I join? :)                                          |
|                                                                                                      | Yes       | Human       | i feel moved by the sunset                                                     |
|                                                                                                      | Yes       | TransResNet | The water at night is a beautiful sight.                                       |
|                                                                                                      | Yes       | UPDOWN      | This is a beautiful sunset!                                                    |
| <br>Ridiculous      | No        | Standard    | Rose colored soft yarn.                                                        |
|                                                                                                      | No        | Engaging    | I really want to untangle that yarn.                                           |
|                                                                                                      | Yes       | Human       | I cannot believe how yummy that looks.                                         |
|                                                                                                      | Yes       | TransResNet | What is up with all the knitting on my feed                                    |
|                                                                                                      | Yes       | UPDOWN      | I would love to be a of that fruit!                                            |
| <br>Maternal       | No        | Standard    | A beautiful mesa town built into the cliffs.                                   |
|                                                                                                      | No        | Engaging    | That is a strange cave                                                         |
|                                                                                                      | Yes       | Human       | It must be very dangerous if children play there                               |
|                                                                                                      | Yes       | TransResNet | I hope my kids don't climb on this.                                            |
|                                                                                                      | Yes       | UPDOWN      | I hope this is a beautiful place.                                              |
| <br>Sophisticated | No        | Standard    | Hockey players competing for control of the hockey puck.                       |
|                                                                                                      | No        | Engaging    | Great save, goalie!!                                                           |
|                                                                                                      | Yes       | Human       | Hockey is a little too barbaric for my taste.                                  |
|                                                                                                      | Yes       | TransResNet | Hockey players gracefully skate across the ice.                                |
|                                                                                                      | Yes       | UPDOWN      | This hockey is like they are a great of the game.                              |
| <br>Happy         | No        | Standard    | Hollywood Tower at Night                                                       |
|                                                                                                      | No        | Engaging    | I went to that theme park, but was too scared to get on that ride!             |
|                                                                                                      | Yes       | Human       | I am so excited to be here!                                                    |
|                                                                                                      | Yes       | TransResNet | I remember going to disney world, it was one of the best trips I've ever done. |
|                                                                                                      | Yes       | UPDOWN      | This looks like a beautiful view!                                              |

Table 18: Example variants of the captions shown to human annotators in the human evaluation tasks in Section 5.3. The first two captions are human annotations not conditioned on a personality; the next three are captions conditioned on the listed personality, and are generated via a human annotator, TransResNet, and UPDOWN respectively.

| Image                                                                               | Personality     | Generated comment                                                      |
|-------------------------------------------------------------------------------------|-----------------|------------------------------------------------------------------------|
|    | Sweet           | What a cute puppy, reminds me of my friends.                           |
|                                                                                     | Skeptical       | I don't think this dog will bite me.                                   |
|                                                                                     | Sympathetic     | poor dog! It looks so hungry :c                                        |
|                                                                                     | Vague           | it's a dog                                                             |
|                                                                                     | Wishful         | I wish that I had a dog as cute as him.                                |
|    | Cultured        | I love a cultural celebration.                                         |
|                                                                                     | Skeptical       | I'm not sure if these are guys in costumes or time travelers.          |
|                                                                                     | Sweet           | I love that they are celebrating their traditions and culture.         |
|                                                                                     | Overimaginative | They look like they could be dancers in a fantasy movie with dragons!  |
|    | Sympathetic     | I feel sorry for him having to wear that                               |
|                                                                                     | Romantic        | If I was an insect, I would definitely make this my mate.              |
|                                                                                     | Humble          | I am grateful that spiders eat these disgusting bugs.                  |
|                                                                                     | Paranoid        | What is going on? Are these insects dangerous?                         |
|                                                                                     | Creative        | I made something like this from colored toothpicks once                |
|   | Money-minded    | how much are those? those looks expensive                              |
|                                                                                     | Happy           | That is so cool! I I love street art!                                  |
|                                                                                     | Optimistic      | The future is bright for people who can dream in artistic ways.        |
|                                                                                     | Critical        | I do believe this taggers verbage is a tad juvenile                    |
|                                                                                     | Charming        | What a charming wall.                                                  |
|  | Adventurous     | I think I could create art like that, I will go learn and take action. |
|                                                                                     | Adventurous     | I am so ready for the conference.                                      |
|                                                                                     | Cultured        | This conference is one of the most important ones in the country.      |
|                                                                                     | Vague           | The organization on that table is uncertain.                           |
|                                                                                     | Dramatic        | OMG!! This ceremony is frightening!                                    |
|  | Sympathetic     | I feel bad for these people being so cramped in this room.             |
|                                                                                     | Old-fashioned   | Such old fashioned script, a true lost art.                            |
|                                                                                     | Charming        | I could use these to write to my loved ones.                           |
|                                                                                     | Argumentative   | Can you even read this through all the jpeg artifacts?                 |
|                                                                                     | Anxious         | I hope this paper doesnt tear, history will be destroyed.              |
|  | Dramatic        | Some of the most profound things ever written have been on linen.      |
|                                                                                     | Wishful         | I wish I could have a life as easy as a plant.                         |
|                                                                                     | Money-minded    | This plant is probably worth a lot of money                            |
|                                                                                     | Critical        | the leaf is ruining the picture                                        |
|                                                                                     | Humble          | This plant is a symbol of life in humble opinion. Just gorgeous!       |
|  | Paranoid        | If you eat this leaf it definetly will not poison you. Or will it...   |
|                                                                                     | Romantic        | This valentine concert is for lovers.                                  |
|                                                                                     | Boyish          | It's always fun to get down and jam with the boys!                     |
|                                                                                     | Creative        | musician performing a song of theirs                                   |
|                                                                                     | Sweet           | oh what lovely young musicians                                         |
|  | Money-minded    | I wonder how much the musicians have in student loan debt.             |

Table 19: More example predictions from our best TRANSRESNET model on the PERSONALITY-CAPTIONS validation set.
